# Supplementary material for: Fish-scale-derived carbon dots as efficient fluorescent nanoprobes for detection of ferric ions
Source: Royal Society of Chemistry journal article supplement (doi:10.1039/c8ra09471c), 2019-01-01
Supplement: c8ra09471c1.pdf [file c8ra09471c1.pdf]

***Supporting Information***

**Fish scales derived carbon dots as efficient fluorescent nanoprobe for detection of ferric ions**

Yi Zhang,<sup>a,b</sup> Zhiyong Gao,<sup>a\*</sup> Xue Yang,<sup>b</sup> Jiuli Chang,<sup>a</sup> Ziyang Liu,<sup>c</sup> and Kai Jiang<sup>a,d\*</sup>

<sup>a</sup> School of Chemistry and Chemical Engineering, Collaborative Innovation Center of Henan Province for Green Manufacturing of Fine Chemicals, Key Laboratory of Green Chemical Media and Reactions, Ministry of Education, Henan Normal University, Henan Xinxiang 453007, P.R. China.

<sup>b</sup> School of Laboratory Medicine, Xinxiang Medical University, Henan Xinxiang 453003, P.R. China.

<sup>c</sup> Maternal and Child Care Service Centre of Xinxiang City, Henan Xinxiang 453000, P.R. China.

<sup>d</sup> School of Environment, Henan Normal University, Henan Xinxiang 453007, P.R. China.

\*Corresponding authors:

E-mail: [zygao512@163.com](mailto:zygao512@163.com) (Z.Gao) Tel./Fax: +86 373 3326336

[kjiang512@163.com](mailto:kjiang512@163.com) (K.Jiang) Tel./Fax: +86 373 3328629.

**Table S1** The concentrations of Fe<sup>3+</sup> standard solutions, injected volumes and the final concentrations of Fe<sup>3+</sup> in the CDs-Fe<sup>3+</sup> assay system. C<sub>CDs</sub>=250 μg mL<sup>-1</sup>

|                                                                                                   |       |       |       |       |       |       |       |       |       |       |       |
|---------------------------------------------------------------------------------------------------|-------|-------|-------|-------|-------|-------|-------|-------|-------|-------|-------|
| Concentration of Fe <sup>3+</sup> standard solution (M)                                           | 0.001 | 0.001 | 0.001 | 0.001 | 0.001 | 0.001 | 0.001 | 0.001 | 0.001 | 0.001 | 0.001 |
| Volume added (μL)                                                                                 | 0     | 4     | 8     | 12    | 16    | 20    | 24    | 28    | 32    | 36    | 40    |
| Ultimate concentration of Fe <sup>3+</sup> in CDs-Fe <sup>3+</sup> system (μmol L <sup>-1</sup> ) | 0     | 1     | 2     | 3     | 4     | 5     | 6     | 7     | 8     | 9     | 10    |
| Concentration of Fe <sup>3+</sup> standard solution (M)                                           | 0.001 | 0.001 | 0.001 | 0.001 | 0.001 | 0.01  | 0.01  | 0.01  | 0.01  | 0.01  | 0.01  |
| Volume added (μL)                                                                                 | 44    | 48    | 64    | 80    | 96    | 11.2  | 13.2  | 15.2  | 17.2  | 19.2  | 21.2  |
| Ultimate concentration of Fe <sup>3+</sup> in CDs-Fe <sup>3+</sup> system (μmol L <sup>-1</sup> ) | 11    | 12    | 16    | 20    | 24    | 28    | 33    | 38    | 43    | 48    | 53    |
| Concentration of Fe <sup>3+</sup> standard solution (M)                                           | 0.01  | 0.01  | 0.01  | 0.01  | 0.01  | 0.01  | 0.01  | 0.01  | 0.01  | 0.01  | 0.01  |
| Volume added (μL)                                                                                 | 23.2  | 252   | 27.2  | 31.2  | 35.2  | 39.2  | 43.2  | 51.2  | 59.2  | 67.2  | 83.2  |
| Ultimate concentration of Fe <sup>3+</sup> in CDs-Fe <sup>3+</sup> system (μmol L <sup>-1</sup> ) | 58    | 63    | 68    | 78    | 88    | 98    | 108   | 128   | 148   | 168   | 188   |
| Concentration of Fe <sup>3+</sup> standard solution (M)                                           | 0.01  | 0.01  | 0.01  | 0.01  | 0.01  | 0.01  | 0.01  | 0.01  | 0.01  | 0.01  | 0.01  |
| Volume added (μL)                                                                                 | 83.2  | 91.2  | 99.2  | 107.2 | 115.2 | 123.2 | 131.2 | 139.2 | 147.2 | 155.2 | 163.2 |
| Ultimate concentration of Fe <sup>3+</sup> in CDs-Fe <sup>3+</sup> system (μmol L <sup>-1</sup> ) | 208   | 228   | 248   | 268   | 288   | 308   | 328   | 348   | 368   | 388   | 408   |
| Concentration of Fe <sup>3+</sup> standard solution (M)                                           | 0.01  | 0.01  | 0.01  | 0.01  |       |       |       |       |       |       |       |
| Volume added (μL)                                                                                 | 171.2 | 179.2 | 187.2 | 196.2 |       |       |       |       |       |       |       |
| Ultimate concentration of Fe <sup>3+</sup> in CDs-Fe <sup>3+</sup> system (μmol L <sup>-1</sup> ) | 428   | 448   | 468   | 488   |       |       |       |       |       |       |       |

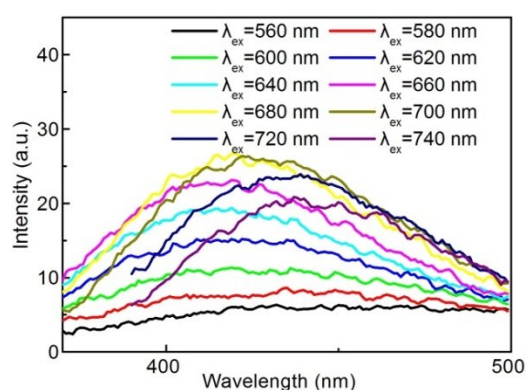

**Fig. S1** Fluorescence emission intensity of CDs within  $\lambda_{ex}$  range of 560~740 nm, C<sub>CDs</sub>: 125 μg mL<sup>-1</sup>.

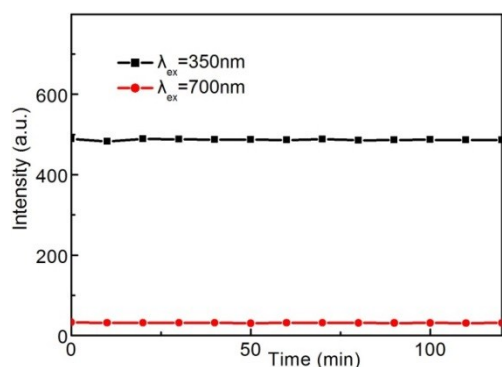

**Fig. S2** Fluorescence emission intensity of CDs at  $\lambda_{ex}$ =350 and 700 nm upon irradiation for different time intervals. C<sub>CDs</sub>: 125 μg mL<sup>-1</sup>

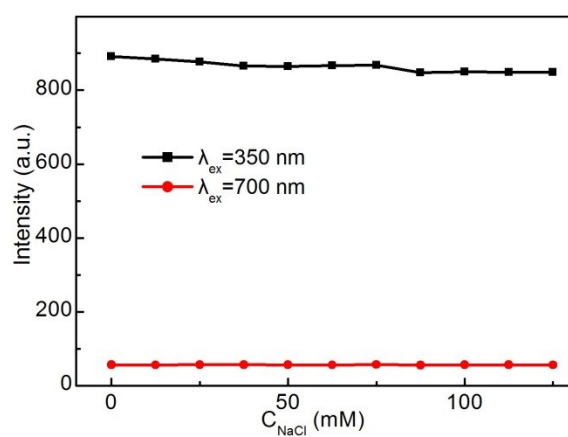

**Fig. S3** Fluorescence emission intensity of aqueous CDs solution with different NaCl concentrations at  $\lambda_{\text{ex}}=350$  and 700 nm.  $C_{\text{CDs}}$ : 250  $\mu\text{g mL}^{-1}$ ,  $C_{\text{NaCl}}$ : 0~125 mM.

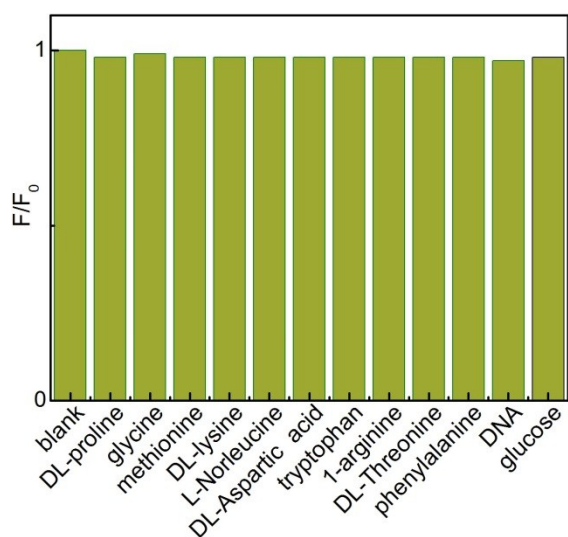

**Fig. S4** Fluorescence responses of CDs to different biomolecules,  $C_{\text{CDs}}$ : 125  $\mu\text{g mL}^{-1}$ , concentration of biomolecules: 2.5  $\mu\text{g L}^{-1}$ .

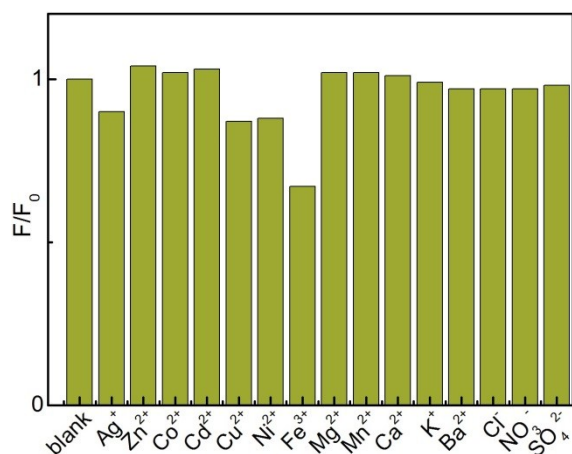

**Fig. S5** Fluorescence responds of CDs towards different metal ions and common anions,  $C_{CDs}$ : 125  $\mu\text{g mL}^{-1}$ , concentration of metal ions and anions: 100  $\mu\text{mol L}^{-1}$ .

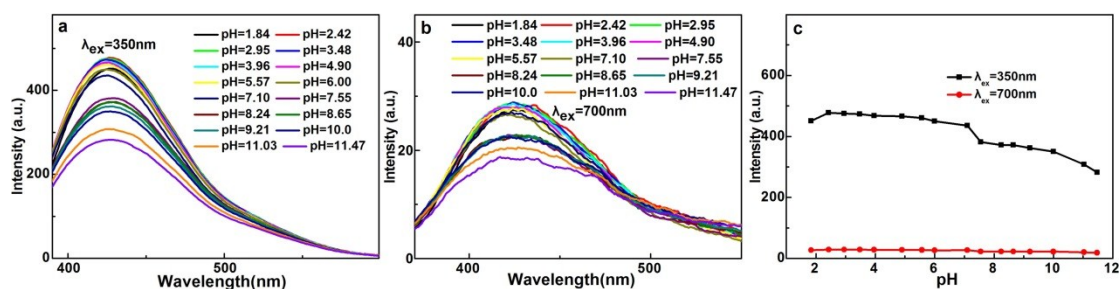

**Fig. S6** PL spectra within pH range of 2-11 at (a)  $\lambda_{ex}=350\text{ nm}$ , (b)  $\lambda_{ex}=700\text{ nm}$ , (c) Emission intensity vs pH plots,  $C_{CDs}$ : 125  $\mu\text{g mL}^{-1}$ .

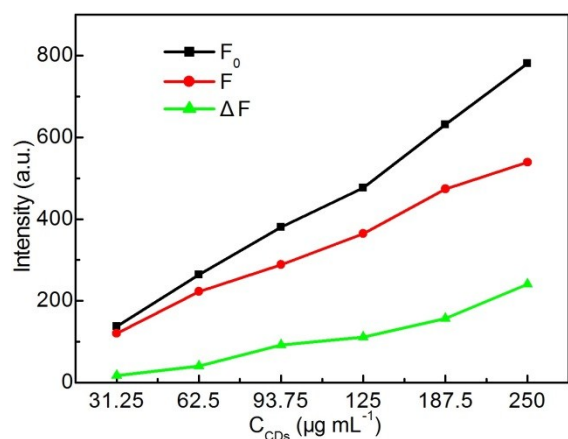

**Fig.S7** Effect of the CDs concentration on fluorescence intensity of CDs- $\text{Fe}^{3+}$  system,  $C_{\text{Fe}^{3+}}=2.5\text{ }\mu\text{mol L}^{-1}$ .

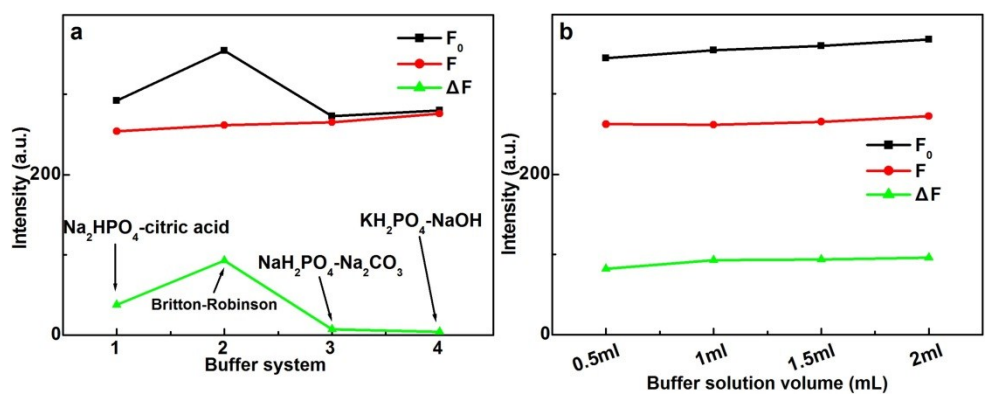

**Fig.S8** Effect of (a) buffer solution type and (b) dosage of BR buffer solution on the fluorescence intensity of CDs- $\text{Fe}^{3+}$  system.  $C_{\text{CDs}} = 125 \mu\text{g mL}^{-1}$ ,  $C_{\text{Fe}^{3+}} = 2.5 \mu\text{mol L}^{-1}$ .

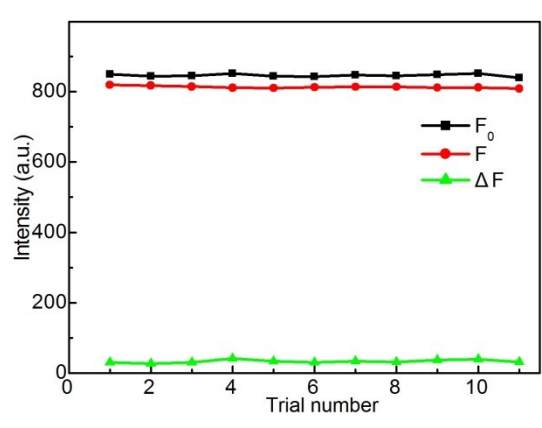

**Fig.S9** Fluorescence intensities of CDs- $\text{Fe}^{3+}$  system at 11 parallel trials.  $C_{\text{CDs}} = 250 \mu\text{g mL}^{-1}$ ,  $C_{\text{Fe}^{3+}} = 2.5 \mu\text{mol L}^{-1}$ .

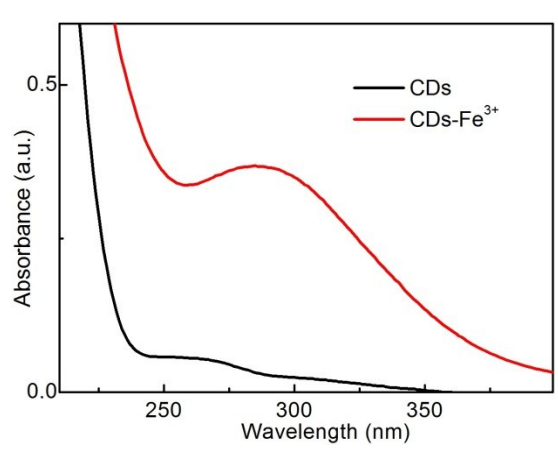

**Fig.S10** UV-Vis absorption spectra of CDs and CDs- $\text{Fe}^{3+}$  system,  $C_{\text{CDs}} = 25 \mu\text{g mL}^{-1}$ ,  $C_{\text{Fe}^{3+}} = 50 \mu\text{mol L}^{-1}$ .
